# Supplementary material for: Cotranscriptional histone H2B monoubiquitylation is tightly coupled with RNA polymerase II elongation rate
Source: HighWire-hosted journal article supplement (doi:10.1101/gr.176487.114), 2014-07-21
Supplement: Supplemental_Figure_Legends.docx [file Supplemental_Figure_Legends.docx]

**Figure S1:** **Distribution of** **H2Bub1 in NT2 and HCT116 cells. Related to Figure 1**

(A) H2Bub1 ChIP-seq was performed in NT2 cells. Shown is a heat map pertaining to the region extending from 1 kb upstream to the transcription start site (TSS) to the end of all human RefSeq genes. Each row represents a gene scaled to fit into 100 equally sized bins. The value of each bin is colored according to the mean number of ChIP-seq reads, scaled to cover data between 0 reads (black) and the ninety-ninth percentile of read numbers (red). Rows were clustered according to their H2Bub1 pattern (Methods). For clarity, only 20% of the rows in each cluster are presented. (B) Mean H2Bub1/H2B ratio in NT2 cells (y axis) of 1st introns of expressed genes grouped according to their length. Introns were scaled to fit in 100 equally sized bins (x axis). A running average of 15 was applied. (C) Mean H2Bub1/H2B ratio in NT2 cells (y axis) of constitutive 1st, 2nd, and 3rd exons of expressed genes (colored in grey, red, and blue, respectively). 75 bps from each exon end and the 250 bps adjacent to them were plotted (x axis). A running average of 50 was applied. (D) Mean H2Bub1/H2B ratio in HCT116 cells (y axis) of internal exons (exon), exonic composition regions (ECR), and pseudo exons (pseudo; colored in red, blue and grey, respectively) in expressed genes. 75 bps from each region end and the 250 bps adjacent to them were plotted (x axis). A running average of 20 was applied. (E) Mean H2Bub1/H2B ratio (y axis) in NT2 (left panel) and HCT116 (right panel) cells of multi-exonic expressed genes grouped according to their number of exons. Gene bodies were scaled from their transcription start site (TSS) to their 3' end to fit in 100 equally sized bins (x axis). A moving average of 25 was applied. a.u., arbitrary units*.*

**Figure S2 Comparison of H2Bub1 and H3K36me3 distribution in intronless versus intron-containing genes reveals dissimilar patterns. Related to Figure 2**

(A, B) Mean H3K36me3 (A) and H2Bub1/H2B (B) ChIP-seq level in NT2 cells (y axis) of intron-containing and intronless genes (solid and dashed lines, respectively) up to 5 kb long, grouped according to their expression level. Gene bodies were scaled to fit in 100 equally sized bins from their transcription start site (TSS) to their 3' end (x axis). A moving average of 10 was applied. a.u., arbitrary units.

**Figure S3: H2B is monoubiquitylated co-transcriptionally. Related to Figure 3**

(A) qRT-PCR analysis of *ITPR1* pre-mRNA at proximal (1 kb downstream to the TSS) and distal (134 kb downstream to the TSS) regions in HeLa cells, following 3 hours of 100 µM DRB treatment (DRB) and at the indicated time points after DRB removal. All values were normalized to 16S rRNA in the same sample. (B) Same treatment as in (B) but cells were subjected to H2Bub1 ChIP analysis. Bars indicate H2Bub1 ChIP readings normalized to input in the same treatment and represent averages from duplicate qPCR reactions; error bars = standard deviation. Similar results were obtained in four independent experiments. (C) Same as (B) but H2Bub1 ChIP was normalized to H2B ChIP. (D). qRT-PCR analysis of *ITPR1* and H2Bub1 ChIP analysis as in (B) but in NT2 cells. Pre-mRNA levels and H2Bub1/H2B ratios after DRB treatment were normalized to NT samples, which were defined as 1.0. Bars indicate averages from duplicate qPCR reactions; error bars = standard deviation.

**Figure S4: Slow elongation rate correlates with reduced spreading of H2Bub1. Related to Figure 3**

(A) qRT-PCR analysis of *TTC17* pre-mRNA in HeLa cells, following 3 hours of 100 µM DRB treatment (DRB) and at the indicated time points after DRB removal. Following removal of DRB cells were kept at 37°c or 32°c. All values were normalized to 16S rRNA in the same sample. (B) Treatment as in (A) but cells were subjected to ChIP analysis with antibodies against H2Bub1 and H2B. Bars indicate H2Bub1 ChIP readings normalized to H2B in the same treatment, and represent averages from duplicate qPCR reactions; error bars = standard deviation. Similar results were obtained in three independent experiments.

**Figure S5: P-TEFb regulates H2B monoubiquitylation in intergenic regions. Related to Figure 3**

ChIP analysis with antibodies against H2Bub1 and H2B of three randomly chosen intergenic region in HeLa cells, following 3 hours of 100 µM DRB treatment (DRB) and at indicated time points after DRB removal. Bars indicate H2Bub1 ChIP reading normalized to H2B in the same treatment, and represent averages from duplicate qPCR reactions; error bars = standard deviation. Similar results were obtained in four independent experiments.

**Figure S6: Genomewide correlation between H2Bub1 levels and elongation rates in multiple cell lines. Related to Figure 5**

Analysis as in Fig. 5A, except that elongation rates for HF1, K562, MCF7, CS-B and TM cells were derived from Veloso et al (2014). A moving average of 700 was applied.

**Figure S7: Exons with low H2Bub1 levels are characterized by high total Pol II occupancy. Related to Figure 6**

Mean total Pol II (generated with POLR2A specific antibody) exonic enrichment (y axis; denoted by mean exon-intron differential Pol II values) in HCT116 cells plotted against the intron-exon H2Bub1 differential (x axis).
