# Supplementary material for: Cotranscriptional histone H2B monoubiquitylation is tightly coupled with RNA polymerase II elongation rate
Source: HighWire-hosted journal article supplement (doi:10.1101/gr.176487.114), 2014-07-21
Supplement: Supplemental_Table1.xlsx [file Supplemental_Table1.xlsx]

## Sheet: Sheet1
Gene		Species	Forward sequence	Reverse sequence	application
OSBPL9 9j10		Human	CAGATTGCCAAAGACCAGAGT	TGCTGATCACAGGTTCCAAA	mRNA
OSBPL9 ex13		Human	AGCCACGTGAACTTGTCTCC	TATTAAGCGCTTTGGGGATG	mRNA
WNK1 ex10		Human	CACGTTGGCTTCATCTGCTA	CTGAGTCACAGGCTGCAGAA	mRNA
WNK1 ex19		Human	ACCCTTGGTACAGCCTGTTG	AATGAGTATGGGGCTGGTTG	mRNA
DFP2 6j7		Human	GTGCCCGTAAGAAGCTGGAT	CGCTTTCGAGGTATGCTTTT	mRNA
DPF2 6j8		Human	CCTATGCCTGTGACATTTGTG	TGGGTGGTTGAGAGTCTTCC	mRNA
OSBPL9 ex10- 2kb		Human	CCACAACTCAGAATGCCTGTCA	AAATCACAGTCAACCCCCTGG	ChIP
OSBPL9 ex10 -1kb		Human	TGAGCAAAGTCCTCACCAAGAT	CTCTTTATTGGCCGTCTACCCT	ChIP
OSBPL9 ex10		Human	GGAGAAGCACGCAGATGGAA	TGCTCTGCAGAAGTAAAGGGA	ChIP
OSBPL9 ex10 +1kb		Human	TCAGTTCAAAGTATGATCCATGGTG	ACAGTCCTTTCCTATGAGGCT	ChIP
OSBPL9 ex10 +2kb		Human	AATCGGATCAGCCTCCATTC	CTTACAAAACCCACTGCTTTGC	ChIP
WNK1 ex10 -1kb		Human	AGGGTAACCAACCCTTGAAGT	CTGCTGTCAGTAACGTACCCA	ChIP
WNK1 ex10 -0.5kb		Human	TCAGGTAGTGGAGAGGGATGA	CAAATGAATTCCTTCCCAGTGGA	ChIP
WNK1 ex10		Human	ATCACAATGGCAGCTGGCA	AGATGAAGCCAACGTGAGCAG	ChIP
WNK1 ex10 +0.5kb		Human	TCCTGTCTCTTCTGTTGGAACC	GAAGCACACAGCAAAGAAGAAT	ChIP
DPF2 ex7 -0.4kb		Human	CTCACAAGTGGGTGGGTAGAC	TCTGGGCAAAAACACAACCC	ChIP
DPF2 ex7		Human	TCAAGGCCTTCTTCTCATGACT	GGCGCTTTCGAGGTATGCTTT	ChIP
DPF2 ex7 +1kb		Human	CTGCTAGGGGAAGGGATGGT	ATACAAGAGTGCCATGTCCCC	ChIP
ARL4C		Human	TGATCCTGAAACGCAGGAAGT	GCGCATTACCGCTTCTTCTT	mRNA
DPP7		Human	CACCGCTGCCTTTTCGTAA	GCAACACTAAGCCTGGAACCA	mRNA
TTC17 +1kb		Human	TCAGAGGCGAGACTGCTTTTC	GCATTTACAAAACGCAGGCA	ChIP + pre-mRNA
TTC17 +92kb		Human	GTGCCCAACTCAGCATTAGCA	TGTGGATATTGGTCTTTGCCG	ChIP + pre-mRNA
Intergenic 1		Human	TTTTTCCCCATCTGTTGGCT	TCTCCAGCTCTGCAACAACCT	ChIP
Intergenic 2		Human	TGAGGATCTGATTCCAGTGCG	TTTCTCTCTCAAGGCCCATGC	ChIP
Intergenic 3		Human	CCAGCCAGACTTTGGATGAGA	GCACAGAGGTGATTCCATGGA	ChIP
GAPDH		Human	CCGGGAGAAGCTGAGTCATG	TTTGCGGTGGAAATGTCCTT	pre-mRNA
GAPDH		Human	ACCCACTCCTCCACCTTTGA	CTGTTGCTGTAGCCAAATTCGT	mRNA
ITPR1 +1kb		Human	TCATGTCCAATGAGGATGCG	ACTTGTTTCCCGGCGAGAA	ChIP + pre-mRNA
ITPR1 +134kb		Human	GCTAAATGGAAGCACATCGCA	ATAGTCTGTGCCCTTGTCCCCT	ChIP + pre-mRNA
16S		Human	CATAAGCCTGCGTCAGATCA	CCTGTGTTGGGTTGACAGTG	rRNA
EGR1 + 1kb		Human	CGTCAGCTGTTGTTGAAATGG	TTGCAATGTTCCTGGACCC	ChIP + pre-mRNA
JUN + 2kb		Human	ACATGCTCAGGGAACAGGTG	CTGCGTTAGCATGAGTTGGC	ChIP + pre-mRNA
